# Supplementary material
Source: PubMed Central journal article supplement (PMC8792366)

**Supporting Information for**

**“Targeted Profiling of Epitranscriptomic Reader, Writer and Eraser Proteins**

**Accompanied with Radioresistance in Breast Cancer Cells”**

Tianyu F. Qi<sup>1</sup>, Weili Miao<sup>2</sup> and Yinsheng Wang<sup>1,2\*</sup>

<sup>1</sup>Environmental Toxicology Graduate Program and <sup>2</sup>Department of Chemistry, University of

California, Riverside,

CA, 92521-0403, USA.

\*Correspondence author: Yinsheng Wang. Telephone: (951)827-2700; E-mail:

yinsheng.wang@ucr.edu

**Table of Contents**

|                       |         |
|-----------------------|---------|
| Materials and Methods | S2-S4   |
| Table S1              | S5-S11  |
| References            | S12-S16 |
| Figure S1             | S17     |

## **Materials and Methods**

### **Cell Culture and SILAC**

The radioresistant clones (C5 and C6) of MDA-MB-231 and MCF-7 cells were generated previously.<sup>1,2</sup> MDA-MB-231/C5 and MCF-7/C5 paired cells were cultured in Dulbecco's modified Eagle medium (DMEM) supplemented with 10% fetal bovine serum (Invitrogen-Gibco) and 1% penicillin/streptomycin. Cells were kept at 37 °C in a humidified atmosphere containing 5% CO<sub>2</sub>. For the SILAC labelling experiments, the MDA-MB-231/C5 and MCF-7/C6 paired cells were cultured in the light DMEM media (i.e., normal lysine and arginine), or the heavy DMEM media i.e., [<sup>13</sup>C<sub>6</sub>, <sup>15</sup>N<sub>2</sub>]-L-lysine and [<sup>13</sup>C<sub>6</sub>]-L-arginine, with the addition of 10% dialyzed FBS (Invitrogen) and 1% penicillin/streptomycin, for at least 21 days to complete incorporate isotope-labeled amino acids.

### **Tryptic digestion of whole cell lysates**

After the complete SILAC labelling, MDA-MB-231/C5 and MCF-7/C6 paired cells were lysed on ice for 30-min using CellLytic M cell lysis reagent (Sigma) supplemented with 1% protease inhibitor cocktail, and centrifuged at 9000 g for 30 min at 4°C. The supernatants were collected, and the protein concentrations in the supernatants were quantified using the Bradford assay. In the forward SILAC labelling experiments, light-isotope-labelled C5 and C6 cell lysates were mixed at 1:1 ratio (by mass) with heavy-isotope-labelled MDA-MB-231 and MCF-7 cell lysates, respectively. In the reverse SILAC labelling experiments, light-isotope-labelled MDA-MB-231 and MCF-7 cell lysates were mixed at 1:1 ratio (by mass) with heavy-isotope-labelled C5 and C6 cell lysates, respectively. Two forward and two reverse labelling experiments were carried out for MDA-MB-231/C5 and MCF-7/C6 pairs of cells.

Following the filter-aided sample preparation (FASP) protocol,<sup>3</sup> 50 µg of protein samples (25 µg of heavy- and light-isotope-labelled cell lysate combined) were denatured twice in 8 M urea in 50 mM NH<sub>4</sub>HCO<sub>3</sub> in the polyethersulfone (PES) Membrane 30 kDa centrifugal filter unit (VWR) by centrifuging at 11,000g for 25 min. The denatured samples were reduced with dithiothreitol at 37 °C for 1 hr, alkylated with iodoacetamide at room temperature for 30 min, followed by washing twice with 50 mM NH<sub>4</sub>HCO<sub>3</sub>. The samples were digested with MS-grade trypsin (Pierce) at 1:50 ratio (trypsin: protein, by mass) in 50 mM NH<sub>4</sub>HCO<sub>3</sub> at 37 °C overnight. The tryptic peptides were collected by centrifugation, dried in a Speed-vac, desalted using OMIX C18 pipet tips (Agilent Technologies), and redissolved in 0.1% formic acid for LC-PRM analysis.

### **Establishment of PRM library**

A PRM library containing unique tryptic peptides from 152 epitranscriptomic RWE proteins was established in Skyline.<sup>4</sup> Two or three unique peptides exhibiting high intensities in previously published shotgun proteomic data were selected to represent each RWE protein in the PRM library,<sup>5</sup> and the MS/MS of these peptides were deposited into the PRM library.<sup>5</sup> Additionally, iRT of each peptide was derived from the linear regression of RT with iRT of tryptic peptides of BSA (with defined iRT) analyzed under the same chromatographic conditions.

### **LC-PRM data acquisition**

Samples were subjected to LC-PRM analysis on a Q Exactive Plus quadrupole-Orbitrap mass spectrometer coupled with a Dionex UltiMate 3000 RSLCnano UPLC system. The analytical column was packed in-house using 3 µm Reprosil-Pur C18-AQ resin (Dr. Maisch GmbH HPLC)

in a ~25-cm long, 75  $\mu\text{m}$  i.d. fused silica column. The trapping column was also prepared in-house using 5  $\mu\text{m}$  Reprosil-Pur C18-AQ resin (Dr. Maisch GmbH HPLC) in a 4-cm long, 150  $\mu\text{m}$  i.d. fused silica column. SILAC samples (500 ng) were separated with a 125-min linear gradient from 6 – 43% mobile phase B (80% acetonitrile in 0.1% formic acid) at a flow rate of 300 nL/min. The spray voltage was 1.8 kV.

Before sample analysis, the tryptic digestion mixture of BSA was analyzed using the LC-PRM method under the same experimental settings, but with  $m/z$  values of ten tryptic peptides of BSA in the inclusion list. After importing the acquired data for BSA peptides to Skyline, three inclusion lists with  $m/z$  and a 7-min RT window of each precursor ion were generated and exported from Skyline with the maximum number of concurrent precursor ions being set at 40. Those inclusion lists were imported for LC-PRM analysis on the Q Exactive Plus mass spectrometer, where the precursor ions were distributed in three separate LC-PRM runs. The precursor ions were isolated in the quadrupole at an isolation window of 1.0  $m/z$ , fragmented in the HCD collision cell at a normalized collision energy (NCE) of 28. Other settings were: MS/MS resolution, 17,500; automated gain control (AGC) target,  $1 \times 10^5$ ; maximum accumulation time: 50 ms.

### LC-PRM data processing

The acquired LC-PRM data were imported to Skyline. In Skyline, the acquired MS/MS of each precursor ion was compared with that in the spectral library, where similarity is measured by dot product (dotp) value.<sup>6</sup> A dotp value of  $> 0.7$  is imposed for positive peptide identification. In addition, 4-6 fragment ions in the light and heavy forms should share the same retention time. The potential interfering fragment ions that do not overlay with other fragment ions were manually excluded (i.e., processed data). The SILAC ratios of each precursor ion were calculated automatically in Skyline.

### Western blots

MDA-MB-231/C5 and MCF-7/C6 pairs of breast cancer cells were lysed with CellLytic M cell lysis reagent (Sigma) supplemented with 1% protease inhibitor cocktail, and denatured at 95 °C for 5-min with Laemmli loading buffer. The same amount of proteins (10-20  $\mu\text{g}$ ) of denatured lysates were separated using SDS-PAGE, and transferred onto a nitrocellulose membrane at 90 V for 60-min at 4 °C. The membrane was blocked with 5% milk in PBS-T (PBS with 0.1% Tween 20) for 45-min, and incubated separately with primary antibodies that recognize human FTO (Abclonal, A1438, 1:1000), TRMT1 (Abclonal, A7116, 1:1000), and GAPDH (Santa Cruz, sc-32233, 1:10,000) at 4 °C overnight. After several thorough washes with PBS-T, the membrane was incubated with donkey anti-rabbit secondary antibody (Sigma, A0545, 1:5,000), or anti-mouse secondary antibody (Santa Cruz, m-IgG $\kappa$  BP-HRP, 1:5,000), followed by several thorough washes with PBS-T. The protein bands were visualized using Amersham ECL<sup>TM</sup> Western Blot Detecting Reagent (GE Healthcare).

### Bioinformatic analyses

All Kaplan-Meier survival analyses of the TCGA and METABRIC cohorts were carried out in the MedCal software (<https://www.medcalc.org/>). GSEA enrichment plots were generated in GSEA 4.1.0 software (<http://www.broad.mit.edu/gsea>) TCGA-BRAC dataset, downloaded from the Xenahubs database ([https://gdc.xenahubs.net/download/TCGA-BRCA.htseq\\_fpkm.tsv.gz](https://gdc.xenahubs.net/download/TCGA-BRCA.htseq_fpkm.tsv.gz)), was sorted by mRNA expression level of *TRMT1* from high to low with median value as cutoff. Patients ( $n = 1,217$ ) were therefore categorized into high- and low-TRMT1-expression group. Gene set

enrichment analysis (GSEA) of the stratified TCGA dataset was carried out against the hallmark gene sets (h.all.v7.4.symbols.gmt) which were downloaded from GSEA Molecular Signatures Database (<http://www.gsea-msigdb.org/gsea/msigdb/collections.jsp#H>). The number of permutations was set at 1000. A gene set with a false discovery rate less than 0.25 was considered significantly enriched.

**Table S1.** A list of epitranscriptomic RWE proteins included in the PRM library. ALKBH2, 4, 6, and 7, with unknown functions in RNA modifications, were also listed.

| Ensembl Gene ID | Protein Name | Description                                                 | Known Functions in RNA modifications                                                                       | References |
|-----------------|--------------|-------------------------------------------------------------|------------------------------------------------------------------------------------------------------------|------------|
| ENSG00000160710 | ADAR         | adenosine deaminase RNA specific                            | A-to-I writer                                                                                              | 7          |
| ENSG00000065457 | ADAT1        | adenosine deaminase tRNA specific 1                         | A-to-I writer                                                                                              | 7          |
| ENSG00000189007 | ADAT2        | adenosine deaminase tRNA specific 2                         | A-to-I writer                                                                                              | 7          |
| ENSG00000213638 | ADAT3        | adenosine deaminase tRNA specific 3                         | A-to-I writer                                                                                              | 7          |
| ENSG00000100601 | ALKBH1       | alkB homolog 1, histone H2A dioxygenase                     | m <sup>1</sup> A, m <sup>5</sup> C eraser                                                                  | 8,9        |
| ENSG00000189046 | ALKBH2       | alkB homolog 2, alpha-ketoglutarate dependent dioxygenase   | potential eraser                                                                                           |            |
| ENSG00000166199 | ALKBH3       | alkB homolog 3, alpha-ketoglutarate dependent dioxygenase   | m <sup>1</sup> A eraser                                                                                    | 10         |
| ENSG00000160993 | ALKBH4       | alkB homolog 4, lysine demethylase                          | potential eraser                                                                                           |            |
| ENSG00000091542 | ALKBH5       | alkB homolog 5, RNA demethylase                             | m <sup>6</sup> A eraser                                                                                    | 11         |
| ENSG00000239382 | ALKBH6       | alkB homolog 6                                              | potential eraser                                                                                           |            |
| ENSG00000125652 | ALKBH7       | alkB homolog 7                                              | potential eraser                                                                                           |            |
| ENSG00000137760 | ALKBH8       | alkB homolog 8, tRNA methyltransferase                      | mcm <sup>5</sup> U, mcm <sup>5</sup> Um, mchm <sup>5</sup> U, and mcm <sup>5</sup> s <sup>2</sup> U writer | 12         |
| ENSG00000183684 | ALYREF       | Aly/REF export factor                                       | m <sup>5</sup> C reader                                                                                    | 13         |
| ENSG00000244509 | APOBEC3C     | apolipoprotein B mRNA editing enzyme catalytic subunit 3C   | C-to-U writer                                                                                              | 14         |
| ENSG00000239713 | APOBEC3G     | apolipoprotein B mRNA editing enzyme catalytic subunit 3G   | C-to-U writer                                                                                              | 15         |
| ENSG00000186666 | BCDIN3D      | BCDIN3 domain containing RNA methyltransferase              | 5' monophosphate methylation writer                                                                        | 16         |
| ENSG00000071462 | BUD23        | BUD23 rRNA methyltransferase and ribosome maturation factor | m <sup>7</sup> G writer                                                                                    | 17         |
| ENSG00000105879 | CBLL1        | Cbl proto-oncogene like 1                                   | m <sup>6</sup> A writer complex                                                                            | 18         |
| ENSG00000101391 | CDK5RAP1     | CDK5 regulatory subunit associated protein 1                | ms <sup>2</sup> i <sup>6</sup> A writer                                                                    | 19         |
| ENSG00000145996 | CDKAL1       | CDK5 regulatory subunit associated protein 1 like 1         | ms <sup>2</sup> t <sup>6</sup> A writer                                                                    | 20         |
| ENSG00000144021 | CIAO1        | cytosolic iron-sulfur assembly component 1                  | s <sup>2</sup> U, mcm <sup>5</sup> s <sup>2</sup> U writer                                                 | 21         |

|                 |        |                                                             |                                                                                                                                                            |       |
|-----------------|--------|-------------------------------------------------------------|------------------------------------------------------------------------------------------------------------------------------------------------------------|-------|
| ENSG0000137200  | CMTR1  | cap methyltransferase 1                                     | N <sub>m</sub> writer                                                                                                                                      | 22    |
| ENSG0000180917  | CMTR2  | cap methyltransferase 2                                     | N <sub>m</sub> writer                                                                                                                                      | 22    |
| ENSG0000142544  | CTU1   | cytosolic thiouridylase subunit 1                           | s <sup>2</sup> U, mcm <sup>5</sup> s <sup>2</sup> U writer                                                                                                 | 23    |
| ENSG0000174177  | CTU2   | cytosolic thiouridylase subunit 2                           | s <sup>2</sup> U, mcm <sup>5</sup> s <sup>2</sup> U writer                                                                                                 | 23    |
| ENSG0000172795  | DCP2   | decapping mRNA 2                                            | m <sup>7</sup> GpppN eraser                                                                                                                                | 24    |
| ENSG0000111063  | DCPS   | decapping enzyme, scavenger                                 | m <sup>7</sup> GpppN eraser                                                                                                                                | 25    |
| ENSG00000086189 | DIMT1  | DIMT1 rRNA methyltransferase and ribosome maturation factor | m <sub>2</sub> <sup>6,6</sup> A writer                                                                                                                     | 26    |
| ENSG0000144535  | DIS3L2 | DIS3 like 3'-5' exoribonuclease 2                           | uridylation reader                                                                                                                                         | 27    |
| ENSG0000130826  | DKC1   | dyskerin pseudouridine synthase 1                           | Ψ writer                                                                                                                                                   | 28    |
| ENSG0000169718  | DUS1L  | dihydrouridine synthase 1 like                              | D writer                                                                                                                                                   | 29    |
| ENSG0000167264  | DUS2   | dihydrouridine synthase 2                                   | D writer                                                                                                                                                   | 29    |
| ENSG0000141994  | DUS3L  | dihydrouridine synthase 3 like                              | D writer                                                                                                                                                   | 30    |
| ENSG0000107581  | EIF3A  | eukaryotic translation initiation factor 3 subunit A        | m <sup>6</sup> A reader                                                                                                                                    | 31    |
| ENSG0000106263  | EIF3B  | eukaryotic translation initiation factor 3 subunit B        | m <sup>6</sup> A reader                                                                                                                                    | 31    |
| ENSG00000066044 | ELAVL1 | ELAV like RNA binding protein 1                             | m <sup>6</sup> A reader                                                                                                                                    | 32    |
| ENSG00000070061 | ELP1   | elongator acetyltransferase complex subunit 1               | cm <sup>5</sup> U, ncm <sup>5</sup> U, mcm <sup>5</sup> U, mcm <sup>5</sup> s <sup>2</sup> U writer                                                        | 21,33 |
| ENSG0000134014  | ELP3   | elongator acetyltransferase complex subunit 3               | cm <sup>5</sup> U, ncm <sup>5</sup> U, mcm <sup>5</sup> U, mcm <sup>5</sup> s <sup>2</sup> U writer                                                        | 21,33 |
| ENSG0000109911  | ELP4   | elongator acetyltransferase complex subunit 4               | cm <sup>5</sup> U, ncm <sup>5</sup> U, mcm <sup>5</sup> U, mcm <sup>5</sup> s <sup>2</sup> U writer                                                        | 21,33 |
| ENSG0000170291  | ELP5   | elongator acetyltransferase complex subunit 5               | cm <sup>5</sup> U, ncm <sup>5</sup> U, mcm <sup>5</sup> U, mcm <sup>5</sup> s <sup>2</sup> U writer                                                        | 21,33 |
| ENSG0000126749  | EMG1   | EMG1 N1-specific pseudouridine methyltransferase            | m <sup>1</sup> acp3-Psi writer                                                                                                                             | 34    |
| ENSG0000105202  | FBL    | fibrillarin                                                 | N <sub>m</sub> writer                                                                                                                                      | 35    |
| ENSG0000102081  | FMR1   | FMRP translational regulator 1                              | m <sup>6</sup> A reader                                                                                                                                    | 36    |
| ENSG0000140718  | FTO    | FTO alpha-ketoglutarate dependent dioxygenase               | m <sup>6</sup> A eraser                                                                                                                                    | 37    |
| ENSG00000068438 | FTSJ1  | FtsJ RNA 2'-O-methyltransferase 1                           | C <sub>m</sub> , U <sub>m</sub> , G <sub>m</sub> , F <sup>5</sup> C <sub>m</sub> , hm <sup>5</sup> C <sub>m</sub> , mcm <sup>5</sup> U <sub>m</sub> writer | 21,38 |

|                  |            |                                                     |                                                            |    |
|------------------|------------|-----------------------------------------------------|------------------------------------------------------------|----|
| ENSG0000108592   | FTSJ3      | FtsJ RNA 2'-O-methyltransferase 3                   | C <sub>m</sub> , U <sub>m</sub> , G <sub>m</sub> writer    | 39 |
| ENSG000010170270 | GON7       | GON7 subunit of KEOPS complex                       | t <sup>6</sup> A writer                                    | 40 |
| ENSG000010130299 | GTPBP3     | GTP binding protein 3, mitochondrial                | tm <sup>5</sup> U writer                                   | 41 |
| ENSG000010162639 | HENMT1     | HEN methyltransferase 1                             | N <sub>m</sub> writer                                      | 42 |
| ENSG000010122566 | HNRNP A2B1 | heterogeneous nuclear ribonucleoprotein A2/B1       | m <sup>6</sup> A reader                                    | 43 |
| ENSG000010092199 | HNRNPC     | heterogeneous nuclear ribonucleoprotein C           | m <sup>6</sup> A reader                                    | 44 |
| ENSG000010072506 | HSD17B10   | hydroxysteroid 17-beta dehydrogenase 10             | m <sup>1</sup> G, m <sup>1</sup> A writer subunit          | 45 |
| ENSG000010159217 | IGF2BP1    | insulin like growth factor 2 mRNA binding protein 1 | m <sup>6</sup> A reader                                    | 46 |
| ENSG000010073792 | IGF2BP2    | insulin like growth factor 2 mRNA binding protein 2 | m <sup>6</sup> A reader                                    | 46 |
| ENSG000010136231 | IGF2BP3    | insulin like growth factor 2 mRNA binding protein 3 | m <sup>6</sup> A reader                                    | 46 |
| ENSG000010136003 | ISCU       | iron-sulfur cluster assembly enzyme                 | s <sup>2</sup> U, mcm <sup>5</sup> s <sup>2</sup> U writer | 21 |
| ENSG000010196976 | LAGE3      | L antigen family member 3                           | t <sup>6</sup> A writer                                    | 47 |
| ENSG000010168806 | LCMT2      | leucine carboxyl methyltransferase 2                | o <sup>2</sup> Yw, yW writer                               | 21 |
| ENSG000010138095 | LRPPRC     | leucine rich pentatricopeptide repeat containing    | m <sup>6</sup> A reader                                    | 48 |
| ENSG000010146834 | MEPCE      | methylphosphate capping enzyme                      | 5' monophosphate methylation writer                        | 49 |
| ENSG000010037897 | METTL1     | methyltransferase like 1                            | m <sup>7</sup> G writer                                    | 50 |
| ENSG000010145388 | METTL14    | methyltransferase like 14                           | m <sup>6</sup> A writer complex                            | 51 |
| ENSG000010169519 | METTL15    | methyltransferase like 15                           | m <sup>4</sup> C writer                                    | 52 |
| ENSG000010127804 | METTL16    | methyltransferase like 16                           | m <sup>6</sup> A writer                                    | 53 |
| ENSG000010165792 | METTL17    | methyltransferase like 17                           | m <sup>4</sup> C, m <sup>5</sup> C writer                  | 54 |
| ENSG000010165055 | METTL2B    | methyltransferase like 2b                           | m <sup>3</sup> C writer                                    | 55 |
| ENSG000010165819 | METTL3     | methyltransferase like 3                            | m <sup>6</sup> A writer complex                            | 51 |
| ENSG000010138382 | METTL5     | methyltransferase like 5                            | m <sup>6</sup> A writer                                    | 56 |
| ENSG000010206562 | METTL6     | methyltransferase like 6                            | m <sup>3</sup> C writer                                    | 55 |

|                 |        |                                               |                                                            |       |
|-----------------|--------|-----------------------------------------------|------------------------------------------------------------|-------|
| ENSG00000123600 | METTL8 | methyltransferase like 8                      | m <sup>3</sup> C writer                                    | 55    |
| ENSG00000197006 | METTL9 | methyltransferase like 9                      | 1-methylhistidine writer                                   | 57    |
| ENSG00000124217 | MOCS3  | molybdenum cofactor synthesis 3               | s <sup>2</sup> U, mcm <sup>5</sup> s <sup>2</sup> U writer | 58    |
| ENSG00000128309 | MPST   | mercaptopyruvate sulfurtransferase            | s <sup>2</sup> U, mcm <sup>5</sup> s <sup>2</sup> U writer | 21    |
| ENSG00000278619 | MRM1   | mitochondrial rRNA methyltransferase 1        | G <sub>m</sub> writer                                      | 59    |
| ENSG00000122687 | MRM2   | mitochondrial rRNA methyltransferase 2        | U <sub>m</sub> writer                                      | 60    |
| ENSG00000171861 | MRM3   | mitochondrial rRNA methyltransferase 3        | G <sub>m</sub> writer                                      | 61    |
| ENSG00000135297 | MTO1   | mitochondrial tRNA translation optimization 1 | tm <sup>5</sup> U writer                                   | 21,62 |
| ENSG00000135372 | NAT10  | N-acetyltransferase 10                        | ac <sup>4</sup> C writer                                   | 63    |
| ENSG00000244005 | NFS1   | NFS1 cysteine desulfurase                     | s <sup>2</sup> U, mcm <sup>5</sup> s <sup>2</sup> U writer | 58    |
| ENSG00000111641 | NOP2   | NOP2 nucleolar protein                        | m <sup>5</sup> C writer                                    | 64    |
| ENSG00000037474 | NSUN2  | NOP2/Sun RNA methyltransferase 2              | m <sup>5</sup> C writer                                    | 65    |
| ENSG00000117481 | NSUN4  | NOP2/Sun RNA methyltransferase 4              | m <sup>5</sup> C writer                                    | 66    |
| ENSG00000130305 | NSUN5  | NOP2/Sun RNA methyltransferase 5              | m <sup>5</sup> C writer                                    | 67    |
| ENSG00000241058 | NSUN6  | NOP2/Sun RNA methyltransferase 6              | m <sup>5</sup> C writer                                    | 68    |
| ENSG00000103274 | NUBP1  | nucleotide binding protein 1                  | s <sup>2</sup> U, mcm <sup>5</sup> s <sup>2</sup> U writer | 21    |
| ENSG00000198585 | NUDT16 | nudix hydrolase 16                            | m <sup>7</sup> GpppN eraser                                | 69    |
| ENSG00000092094 | OSGEP  | O-sialoglycoprotein endopeptidase             | t <sup>6</sup> A writer                                    | 70    |
| ENSG00000100982 | PCIF1  | phosphorylated CTD interacting factor 1       | m <sup>6</sup> A <sub>m</sub> writer                       | 71    |
| ENSG00000204469 | PRRC2A | proline rich coiled-coil 2A                   | m <sup>6</sup> A reader                                    | 72    |
| ENSG00000177192 | PUS1   | pseudouridine synthase 1                      | Ψ writer                                                   | 73    |
| ENSG00000162927 | PUS10  | pseudouridine synthase 10                     | Ψ writer                                                   | 74    |
| ENSG00000110060 | PUS3   | pseudouridine synthase 3                      | Ψ writer                                                   | 75    |
| ENSG00000091127 | PUS7   | pseudouridine synthase 7                      | Ψ writer                                                   | 76    |



|                 |          |                                                         |                                                            |       |
|-----------------|----------|---------------------------------------------------------|------------------------------------------------------------|-------|
| ENSG0000129317  | PUS7L    | pseudouridine synthase 7 like                           | Ψ writer                                                   | 77    |
| ENSG00000213339 | QTRT1    | queuine tRNA-ribosyltransferase catalytic subunit 1     | Q writer                                                   | 78    |
| ENSG00000151576 | QTRT2    | queuine tRNA-ribosyltransferase accessory subunit 2     | Q writer                                                   | 79    |
| ENSG00000162775 | RBM15    | RNA binding motif protein 15                            | m <sup>6</sup> A writer complex                            | 80    |
| ENSG00000259956 | RBM15B   | RNA binding motif protein 15B                           | m <sup>6</sup> A writer complex                            | 80    |
| ENSG00000147274 | RBMX     | RNA binding motif protein X-linked                      | m <sup>6</sup> A reader                                    | 81    |
| ENSG00000111880 | RNGTT    | RNA guanylyltransferase and 5'-phosphatase              | m <sup>7</sup> GpppN writer                                | 82    |
| ENSG00000101654 | RNMT     | RNA guanine-7 methyltransferase                         | m <sup>7</sup> GpppN writer                                | 82    |
| ENSG00000007376 | RPUSD1   | RNA pseudouridine synthase domain containing 1          | ψ (probable) writer                                        | 83    |
| ENSG00000166133 | RPUSD2   | RNA pseudouridine synthase domain containing 2          | ψ (probable) writer                                        | 83    |
| ENSG00000156990 | RPUSD3   | RNA pseudouridine synthase D3                           | ψ writer                                                   | 83    |
| ENSG00000165526 | RPUSD4   | RNA pseudouridine synthase D4                           | ψ writer                                                   | 83    |
| ENSG00000132275 | RRP8     | ribosomal RNA processing 8                              | m <sup>1</sup> A writer                                    | 84    |
| ENSG00000129158 | SERGEF   | secretion regulating guanine nucleotide exchange factor | s <sup>2</sup> U, mcm <sup>5</sup> s <sup>2</sup> U writer | 21    |
| ENSG00000197157 | SND1     | staphylococcal nuclease and tudor domain containing 1   | m <sup>6</sup> A reader                                    | 85    |
| ENSG00000100138 | SNU13    | small nuclear ribonucleoprotein 13                      | methylation writer complex                                 | 86    |
| ENSG00000059588 | TARBP1   | TAR (HIV-1) RNA binding protein 1                       | G <sub>m</sub> writer                                      | 87    |
| ENSG00000029639 | TFB1M    | transcription factor B1, mitochondrial                  | m <sup>6</sup> <sub>2</sub> A writer                       | 88    |
| ENSG00000162851 | TFB2M    | transcription factor B2, mitochondrial                  | m <sup>6</sup> <sub>2</sub> A writer                       | 88    |
| ENSG00000137574 | TGS1     | trimethylguanosine synthase 1                           | m <sup>2,2,7</sup> G writer                                | 89    |
| ENSG00000113272 | THG1L    | tRNA-histidine guanylyltransferase 1 like               | xG writer                                                  | 21    |
| ENSG00000066654 | THUMP D1 | THUMP domain containing 1                               | ac <sup>4</sup> C writer unit                              | 90    |
| ENSG00000172315 | TP53RK   | TP53 regulating kinase                                  | t <sup>6</sup> A writer                                    | 21,91 |
| ENSG00000144034 | TPRKB    | TP53RK binding protein                                  | t <sup>6</sup> A writer                                    | 21,91 |

|                 |         |                                                           |                                           |        |
|-----------------|---------|-----------------------------------------------------------|-------------------------------------------|--------|
| ENSG00000107614 | TRDMT1  | tRNA aspartic acid methyltransferase 1                    | m <sup>5</sup> C writer                   | 92     |
| ENSG00000043514 | TRIT1   | tRNA isopentenyltransferase 1                             | i <sup>6</sup> A writer                   | 93     |
| ENSG00000104907 | TRMT1   | tRNA methyltransferase 1                                  | m <sup>2,2</sup> G writer                 | 94     |
| ENSG00000145331 | TRMT10A | tRNA methyltransferase 10A                                | m <sup>1</sup> G writer                   | 95     |
| ENSG00000174173 | TRMT10C | tRNA methyltransferase 10C, mitochondrial RNase P subunit | m <sup>1</sup> A, m <sup>1</sup> G writer | 21,96  |
| ENSG00000066651 | TRMT11  | tRNA methyltransferase 11 homolog                         | m <sup>2</sup> G writer                   | 97     |
| ENSG00000173113 | TRMT112 | tRNA methyltransferase subunit 11-2                       | m <sup>7</sup> G writer                   | 98     |
| ENSG00000122435 | TRMT13  | tRNA methyltransferase 13 homolog                         | C <sub>m</sub> , A <sub>m</sub> writer    | 99     |
| ENSG00000099899 | TRMT2A  | tRNA methyltransferase 2 homolog A                        | m <sup>5</sup> U writer                   | 100    |
| ENSG00000155275 | TRMT44  | tRNA methyltransferase 44 homolog                         | U <sub>m</sub> writer                     | 21     |
| ENSG00000126814 | TRMT5   | tRNA methyltransferase 5                                  | m <sup>1</sup> G, m <sup>1</sup> I writer | 21,101 |
| ENSG00000089195 | TRMT6   | tRNA methyltransferase 6                                  | m <sup>1</sup> A writer                   | 96     |
| ENSG00000166166 | TRMT61A | tRNA methyltransferase 61A                                | m <sup>1</sup> A writer                   | 96     |
| ENSG00000171103 | TRMT61B | tRNA methyltransferase 61B                                | m <sup>1</sup> A writer                   | 102    |
| ENSG00000100416 | TRMU    | tRNA mitochondrial 2-thiouridylase                        | mnm <sup>5</sup> s <sup>2</sup> U writer  | 103    |
| ENSG00000165832 | TRUB1   | TruB pseudouridine synthase family member 1               | Ψ writer                                  | 104    |
| ENSG00000167112 | TRUB2   | TruB pseudouridine synthase family member 2               | Ψ writer                                  | 105    |
| ENSG00000134744 | TUT4    | terminal uridylyl transferase 4                           | uridylation writer                        | 106    |
| ENSG00000083223 | TUT7    | terminal uridylyl transferase 7                           | uridylation writer                        | 106    |
| ENSG00000198874 | TYW1    | tRNA-yW synthesizing protein 1 homolog                    | 4-demethylwyosine writer                  | 107    |
| ENSG00000162623 | TYW3    | tRNA-yW synthesizing protein 3 homolog                    | 7-aminocarboxypropylwyosine writer        | 108    |
| ENSG00000167118 | URM1    | ubiquitin related modifier 1                              | mcm <sup>5</sup> s <sup>2</sup> U writer  | 108    |
| ENSG00000164944 | VIRMA   | vir like m <sup>6</sup> A methyltransferase associated    | m <sup>6</sup> A writer complex           | 109    |
| ENSG00000160193 | WDR4    | WD repeat domain 4                                        | m <sup>7</sup> G writer                   | 50     |

|                |        |                                                        |                                                                                                         |             |
|----------------|--------|--------------------------------------------------------|---------------------------------------------------------------------------------------------------------|-------------|
| ENSG0000178252 | WDR6   | WD repeat domain 6                                     | C <sub>m</sub> , G <sub>m</sub> , f <sup>5</sup> C <sub>m</sub> , hm <sup>5</sup> C <sub>m</sub> writer | 21,38       |
| ENSG0000146457 | WTAP   | WT1 associated protein                                 | m <sup>6</sup> A writer complex                                                                         | 110         |
| ENSG0000065978 | YBX1   | Y-box binding protein 1                                | m <sup>5</sup> C reader                                                                                 | 111         |
| ENSG0000196449 | YRDC   | yrdC N6-threonylcarbamoyltransferase domain containing | t <sup>6</sup> A writer                                                                                 | 47          |
| ENSG0000083896 | YTHDC1 | YTH domain containing 1                                | m <sup>6</sup> A reader                                                                                 | 112         |
| ENSG0000047188 | YTHDC2 | YTH domain containing 2                                | m <sup>6</sup> A reader                                                                                 | 113         |
| ENSG0000149658 | YTHDF1 | YTH N6-methyladenosine RNA binding protein 1           | m <sup>6</sup> A, m <sup>1</sup> A reader                                                               | 112         |
| ENSG0000198492 | YTHDF2 | YTH N6-methyladenosine RNA binding protein 2           | m <sup>6</sup> A, m <sup>1</sup> A, m <sup>5</sup> C reader                                             | 112,114,115 |
| ENSG0000185728 | YTHDF3 | YTH N6-methyladenosine RNA binding protein 3           | m <sup>6</sup> A, m <sup>1</sup> A reader                                                               | 112,114     |
| ENSG0000123200 | ZC3H13 | zinc finger CCCH-type containing 13                    | m <sup>6</sup> A writer complex                                                                         | 116         |
| ENSG0000168228 | ZCCHC4 | zinc finger CCHC-type containing 4                     | m <sup>6</sup> A writer                                                                                 | 117         |

### RNA modifications and their abbreviations:

I, inosine; m<sup>1</sup>A, 1-methyladenosine; m<sup>5</sup>C, 5-methylcytidine; m<sup>6</sup>A, N<sup>6</sup>-methyladenosine; mcm<sup>5</sup>U, 5-methoxycarbonylmethyluridine; mcm<sup>5</sup>U<sub>m</sub>, 5-methoxycarbonylmethyl-2'-O-methyluridine; mchm<sup>5</sup>U, 5-(carboxyhydroxymethyl)uridine methyl ester; mcm<sup>5</sup>s<sup>2</sup>U, 5-methoxycarbonylmethyl-2-thiouridine; m<sup>7</sup>G, 7-methylguanosine; ms<sup>2</sup>i<sup>6</sup>A, 2-methylthio-N<sup>6</sup>-isopentenyladenosine; ms<sup>2</sup>t<sup>6</sup>A, 2-methylthio-N<sup>6</sup>-threonylcarbamoyladenine; s<sup>2</sup>U, 2-thiouridine; N<sub>m</sub>, 2'-O-methylation; m<sub>2</sub><sup>6,6</sup>A, N<sup>6,6</sup>-dimethyladenosine; Ψ, pseudouridine; D, dihydrouridine; cm<sup>5</sup>U, 5-carboxymethyluridine; ncm<sup>5</sup>U, 5-carbamoylmethyluridine; m1acp3-Psi, N<sup>1</sup>-methyl-N<sup>3</sup>-(3-amino-3-carboxypropyl) pseudouridine; C<sub>m</sub>, 2'-O-methylcytidine; U<sub>m</sub>, 2'-O-methyluridine; G<sub>m</sub>, 2'-O-methylguanosine; f<sup>5</sup>C<sub>m</sub>, 5-formyl-2'-O-methylcytidine; hm<sup>5</sup>C<sub>m</sub>, 2'-O-methyl-5-hydroxymethylcytidine; t<sup>6</sup>A, N<sup>6</sup>-threonylcarbamoyladenine; tm<sup>5</sup>U, 5-taurinomethyluridine; m<sup>1</sup>G, 1-methylguanosine; o2Yw, peroxywybutosine; yW, wybutosine; m<sup>4</sup>C, N<sup>4</sup>-methylcytidine; m<sup>3</sup>C, 3-methylcytidine; ac<sup>4</sup>C, N<sup>4</sup>-acetylcytidine; m<sup>6</sup>Am, N<sup>6</sup>,2'-O-dimethyladenosine; Q, queuosine; m<sub>2</sub><sup>6</sup>A, N<sup>6</sup>,N<sup>6</sup>-dimethyladenosine; m<sup>2,2,7</sup>G, N<sup>2</sup>,N<sup>2</sup>,7-trimethylguanosine; xG, unknown modified guanosine; m<sup>2,2</sup>G, N<sup>2</sup>,N<sup>2</sup>-dimethylguanosine; m<sup>2</sup>G, N<sup>2</sup>-methylguanosine; m<sup>5</sup>U, 5-methyluridine; m<sup>1</sup>I, 1-methylinosine; mmm<sup>5</sup>s<sup>2</sup>U, 5-methylaminomethyl-2-thiouridine

## References

- (1) Ahmed, K. M.; Dong, S.; Fan, M.; Li, J. J. **2006**, *4*, 945-955.
- (2) Cao, N.; Li, S.; Wang, Z.; Ahmed, K. M.; Degnan, M. E.; Fan, M.; Dynlacht, J. R.; Li, J. J. *Radiat. Res.* **2009**, *171*, 9-21.
- (3) Wisniewski, J. R.; Zougman, A.; Nagaraj, N.; Mann, M. *Nat. Meth.* **2009**, *6*, 359-362.
- (4) MacLean, B.; Tomazela, D. M.; Shulman, N.; Chambers, M.; Finney, G. L.; Frewen, B.; Kern, R.; Tabb, D. L.; Liebler, D. C.; MacCoss, M. J. *Bioinformatics* **2010**, *26*, 966-968.
- (5) Miao, W. L.; Li, L.; Wang, Y. S. *Anal. Chem.* **2018**, *90*, 6835-6842.
- (6) Kawahara, R.; Bollinger, J. G.; Rivera, C.; Ribeiro, A. C. P.; Brandão, T. B.; Paes Leme, A. F.; MacCoss, M. J. *Proteomics* **2016**, *16*, 159-173.
- (7) Nishikura, K. *Annu. Rev. Biochem.* **2010**, *79*, 321-349.
- (8) Liu, F.; Clark, W.; Luo, G.; Wang, X.; Fu, Y.; Wei, J.; Wang, X.; Hao, Z.; Dai, Q.; Zheng, G.; Ma, H.; Han, D.; Evans, M.; Klungland, A.; Pan, T.; He, C. *Cell* **2016**, *167*, 816-828.e816.
- (9) Chen, Y. S.; Yang, W. L.; Zhao, Y. L.; Yang, Y. G. *Wiley interdisciplinary reviews. RNA* **2021**, *12*, e1639.
- (10) Li, X.; Xiong, X.; Wang, K.; Wang, L.; Shu, X.; Ma, S.; Yi, C. *Nat. Chem. Biol.* **2016**, *12*, 311-316.
- (11) Zheng, G.; Dahl, J. A.; Niu, Y.; Fedorcsak, P.; Huang, C. M.; Li, C. J.; Vågbo, C. B.; Shi, Y.; Wang, W. L.; Song, S. H.; Lu, Z.; Bosmans, R. P.; Dai, Q.; Hao, Y. J.; Yang, X.; Zhao, W. M.; Tong, W. M.; Wang, X. J.; Bogdan, F.; Furu, K., et al. *Mol. Cell* **2013**, *49*, 18-29.
- (12) van den Born, E.; Vågbo, C. B.; Songe-Møller, L.; Leihne, V.; Lien, G. F.; Leszczynska, G.; Malkiewicz, A.; Krokan, H. E.; Kirpekar, F.; Klungland, A.; Falnes, P. Ø. *Nature Communications* **2011**, *2*, 172.
- (13) Yang, X.; Yang, Y.; Sun, B. F.; Chen, Y. S.; Xu, J. W.; Lai, W. Y.; Li, A.; Wang, X.; Bhattarai, D. P.; Xiao, W.; Sun, H. Y.; Zhu, Q.; Ma, H. L.; Adhikari, S.; Sun, M.; Hao, Y. J.; Zhang, B.; Huang, C. M.; Huang, N.; Jiang, G. B., et al. *Cell Res.* **2017**, *27*, 606-625.
- (14) Chen, Z.; Eggerman, T. L.; Bocharov, A. V.; Baranova, I. N.; Vishnyakova, T. G.; Kurlander, R. J.; Csako, G.; Patterson, A. P. *J. Mol. Biol.* **2012**, *418*, 65-81.
- (15) Sharma, S.; Wang, J.; Alqassim, E.; Portwood, S.; Cortes Gomez, E.; Maguire, O.; Basse, P. H.; Wang, E. S.; Segal, B. H.; Baysal, B. E. *Genome Biol* **2019**, *20*, 37.
- (16) Xhemalce, B.; Robson, S. C.; Kouzarides, T. *Cell* **2012**, *151*, 278-288.
- (17) Létoquart, J.; Huvelle, E.; Wacheul, L.; Bourgeois, G.; Zorbas, C.; Graille, M.; Heurgué-Hamard, V.; Lafontaine, D. L. *Proc. Natl. Acad. Sci. U. S. A.* **2014**, *111*, E5518-5526.
- (18) Zheng, F.; Du, F.; Qian, H.; Zhao, J.; Wang, X.; Yue, J.; Hu, N.; Si, Y.; Xu, B.; Yuan, P. *Biomarker research* **2021**, *9*, 28.
- (19) Fakruddin, M.; Wei, F. Y.; Emura, S.; Matsuda, S.; Yasukawa, T.; Kang, D.; Tomizawa, K. *Nucleic Acids Res.* **2017**, *45*, 11954-11961.
- (20) Wei, F. Y.; Suzuki, T.; Watanabe, S.; Kimura, S.; Kaitsuka, T.; Fujimura, A.; Matsui, H.; Atta, M.; Michiue, H.; Fontecave, M.; Yamagata, K.; Suzuki, T.; Tomizawa, K. *The Journal of clinical investigation* **2011**, *121*, 3598-3608.
- (21) de Crécy-Lagard, V.; Boccaletto, P.; Mangleburg, C. G.; Sharma, P.; Lowe, T. M.; Leidel, S. A.; Bujnicki, J. M. *Nucleic Acids Res.* **2019**, *47*, 2143-2159.
- (22) Smietanski, M.; Werner, M.; Purta, E.; Kaminska, K. H.; Stepinski, J.; Darzynkiewicz, E.; Nowotny, M.; Bujnicki, J. M. *Nat Commun* **2014**, *5*, 3004.
- (23) Dewez, M.; Bauer, F.; Dieu, M.; Raes, M.; Vandenhoute, J.; Hermand, D. *Proc. Natl. Acad. Sci. U. S. A.* **2008**, *105*, 5459-5464.
- (24) Wang, Z.; Jiao, X.; Carr-Schmid, A.; Kiledjian, M. *Proc. Natl. Acad. Sci. U. S. A.* **2002**, *99*, 12663-12668.
- (25) van Dijk, E.; Le Hir, H.; Séraphin, B. *Proc. Natl. Acad. Sci. U. S. A.* **2003**, *100*, 12081-12086.
- (26) Shen, H.; Stoute, J.; Liu, K. F. *J. Biol. Chem.* **2020**, *295*, 12058-12070.

- (27) Ustianenko, D.; Hrossova, D.; Potesil, D.; Chalupnikova, K.; Hrazdilova, K.; Pachernik, J.; Cetkovska, K.; Uldrijan, S.; Zdrahal, Z.; Vanacova, S. *RNA (New York, N.Y.)* **2013**, *19*, 1632-1638.
- (28) Heiss, N. S.; Knight, S. W.; Vulliamy, T. J.; Klauck, S. M.; Wiemann, S.; Mason, P. J.; Poustka, A.; Dokal, I. *Nat. Genet.* **1998**, *19*, 32-38.
- (29) Xing, F.; Martzen, M. R.; Phizicky, E. M. *RNA (New York, N.Y.)* **2002**, *8*, 370-381.
- (30) Dai, W.; Li, A.; Yu, N. J.; Nguyen, T.; Leach, R. W.; Wühr, M.; Kleiner, R. E. *Nat. Chem. Biol.* **2021**, *17*, 1178-1187.
- (31) Meyer, K. D.; Patil, D. P.; Zhou, J.; Zinoviev, A.; Skabkin, M. A.; Elemento, O.; Pestova, T. V.; Qian, S. B.; Jaffrey, S. R. *Cell* **2015**, *163*, 999-1010.
- (32) Chen, Y.; Peng, C.; Chen, J.; Chen, D.; Yang, B.; He, B.; Hu, W.; Zhang, Y.; Liu, H.; Dai, L.; Xie, H.; Zhou, L.; Wu, J.; Zheng, S. *Molecular cancer* **2019**, *18*, 127.
- (33) Chen, C.; Huang, B.; Anderson, J. T.; Byström, A. S. *PLoS One* **2011**, *6*, e20783.
- (34) Wurm, J. P.; Meyer, B.; Bahr, U.; Held, M.; Frolow, O.; Kötter, P.; Engels, J. W.; Heckel, A.; Karas, M.; Entian, K. D.; Wöhnert, J. *Nucleic Acids Res.* **2010**, *38*, 2387-2398.
- (35) Elliott, B. A.; Ho, H.-T.; Ranganathan, S. V.; Vangaveti, S.; Ilkayeva, O.; Abou Assi, H.; Choi, A. K.; Agris, P. F.; Holley, C. L. *Nature Communications* **2019**, *10*, 3401.
- (36) Worpenberg, L.; Paolantoni, C.; Longhi, S.; Mulorz, M. M.; Lence, T.; Wessels, H. H.; Dassi, E.; Aiello, G.; Sutandy, F. X. R.; Scheibe, M.; Edupuganti, R. R.; Busch, A.; Möckel, M. M.; Vermeulen, M.; Butter, F.; König, J.; Notarangelo, M.; Ohler, U.; Dieterich, C.; Quattrone, A., et al. *EMBO J* **2021**, *40*, e104975.
- (37) Jia, G.; Fu, Y.; Zhao, X.; Dai, Q.; Zheng, G.; Yang, Y.; Yi, C.; Lindahl, T.; Pan, T.; Yang, Y. G.; He, C. *Nat. Chem. Biol.* **2011**, *7*, 885-887.
- (38) Li, J.; Wang, Y. N.; Xu, B. S.; Liu, Y. P.; Zhou, M.; Long, T.; Li, H.; Dong, H.; Nie, Y.; Chen, P. R.; Wang, E. D.; Liu, R. J. *EMBO Rep.* **2020**, *21*, e50095.
- (39) Ringear, M.; Marchand, V.; Decroly, E.; Motorin, Y.; Bennasser, Y. *Nature* **2019**, *565*, 500-504.
- (40) Zhang, W.; Collinet, B.; Graille, M.; Daugeron, M. C.; Lazar, N.; Libri, D.; Durand, D.; van Tilbeurgh, H. *Nucleic Acids Res.* **2015**, *43*, 3358-3372.
- (41) Kopajtich, R.; Nicholls, T. J.; Rorbach, J.; Metodiev, M. D.; Freisinger, P.; Mandel, H.; Vanlander, A.; Ghezzi, D.; Carrozzo, R.; Taylor, R. W.; Marquard, K.; Murayama, K.; Wieland, T.; Schwarzmayr, T.; Mayr, J. A.; Pearce, S. F.; Powell, C. A.; Saada, A.; Ohtake, A.; Invernizzi, F., et al. *Am. J. Hum. Genet.* **2014**, *95*, 708-720.
- (42) Lim, S. L.; Qu, Z. P.; Kortschak, R. D.; Lawrence, D. M.; Geoghegan, J.; Hempfling, A. L.; Bergmann, M.; Goodnow, C. C.; Ormandy, C. J.; Wong, L.; Mann, J.; Scott, H. S.; Jamsai, D.; Adelson, D. L.; O'Bryan, M. K. *PLoS genetics* **2015**, *11*, e1005620.
- (43) Alarcón, C. R.; Goodarzi, H.; Lee, H.; Liu, X.; Tavazoie, S.; Tavazoie, S. F. *Cell* **2015**, *162*, 1299-1308.
- (44) Liu, N.; Dai, Q.; Zheng, G.; He, C.; Parisien, M.; Pan, T. *Nature* **2015**, *518*, 560-564.
- (45) Oerum, S.; Roovers, M.; Rambo, R. P.; Kopec, J.; Bailey, H. J.; Fitzpatrick, F.; Newman, J. A.; Newman, W. G.; Amberger, A.; Zschocke, J.; Droogmans, L.; Oppermann, U.; Yue, W. W. *J. Biol. Chem.* **2018**, *293*, 12862-12876.
- (46) Huang, H.; Weng, H.; Sun, W.; Qin, X.; Shi, H.; Wu, H.; Zhao, B. S.; Mesquita, A.; Liu, C.; Yuan, C. L.; Hu, Y. C.; Huttelmaier, S.; Skibbe, J. R.; Su, R.; Deng, X.; Dong, L.; Sun, M.; Li, C.; Nachtergaele, S.; Wang, Y., et al. *Nat. Cell Biol.* **2018**, *20*, 285-295.
- (47) Arrondel, C.; Missouri, S.; Snoek, R.; Patat, J.; Menara, G.; Collinet, B.; Liger, D.; Durand, D.; Gribouval, O.; Boyer, O.; Buscara, L.; Martin, G.; Machuca, E.; Nevo, F.; Lescop, E.; Braun, D. A.; Bosch, A. C.; Sanquer, S.; Guerrero, I. C.; Revy, P., et al. *Nat Commun* **2019**, *10*, 3967.
- (48) Arguello, A. E.; DeLiberto, A. N.; Kleiner, R. E. *J. Am. Chem. Soc.* **2017**, *139*, 17249-17252.
- (49) Yang, Y.; Eichhorn, C. D.; Wang, Y.; Cascio, D.; Feigon, J. *Nat. Chem. Biol.* **2019**, *15*, 132-140.
- (50) Lin, S.; Liu, Q.; Lelyveld, V. S.; Choe, J.; Szostak, J. W.; Gregory, R. I. *Mol. Cell* **2018**, *71*, 244-255.e245.

- (51) Liu, J.; Yue, Y.; Han, D.; Wang, X.; Fu, Y.; Zhang, L.; Jia, G.; Yu, M.; Lu, Z.; Deng, X.; Dai, Q.; Chen, W.; He, C. *Nat. Chem. Biol.* **2014**, *10*, 93-95.
- (52) Laptev, I.; Shvetsova, E.; Levitskii, S.; Serebryakova, M.; Rubtsova, M.; Zgoda, V.; Bogdanov, A.; Kamenski, P.; Sergiev, P.; Dontsova, O. *Nucleic Acids Res.* **2020**, *48*, 8022-8034.
- (53) Pendleton, K. E.; Chen, B.; Liu, K.; Hunter, O. V.; Xie, Y.; Tu, B. P.; Conrad, N. K. *Cell* **2017**, *169*, 824-835.e814.
- (54) Shi, Z.; Xu, S.; Xing, S.; Yao, K.; Zhang, L.; Xue, L.; Zhou, P.; Wang, M.; Yan, G.; Yang, P.; Liu, J.; Hu, Z.; Lan, F. *FASEB J.* **2019**, *33*, 13040-13050.
- (55) Xu, L.; Liu, X.; Sheng, N.; Oo, K. S.; Liang, J.; Chionh, Y. H.; Xu, J.; Ye, F.; Gao, Y. G.; Dedon, P. C.; Fu, X. Y. *J. Biol. Chem.* **2017**, *292*, 14695-14703.
- (56) van Tran, N.; Ernst, F. G. M.; Hawley, B. R.; Zorbas, C.; Ulryck, N.; Hackert, P.; Bohnsack, K. E.; Bohnsack, M. T.; Jaffrey, S. R.; Graille, M.; Lafontaine, D. L. J. *Nucleic Acids Res.* **2019**, *47*, 7719-7733.
- (57) Davydova, E.; Shimazu, T.; Schuhmacher, M. K.; Jakobsson, M. E.; Willemen, H.; Liu, T.; Moen, A.; Ho, A. Y. Y.; Maflecki, J.; Schroer, L.; Pinto, R.; Suzuki, T.; Grønsberg, I. A.; Sohtome, Y.; Akakabe, M.; Weirich, S.; Kikuchi, M.; Olsen, J. V.; Dohmae, N.; Umehara, T., et al. *Nat Commun* **2021**, *12*, 891.
- (58) Neukranz, Y.; Kotter, A.; Beilschmidt, L.; Marelja, Z.; Helm, M.; Gräf, R.; Leimkühler, S. *Biochemistry* **2019**, *58*, 1786-1798.
- (59) Lee, K.-W.; Bogenhagen, D. F. *The Journal of biological chemistry* **2014**, *289*, 24936-24942.
- (60) Pintard, L.; Bujnicki, J. M.; Lapeyre, B.; Bonnerot, C. *EMBO J* **2002**, *21*, 1139-1147.
- (61) Rorbach, J.; Boesch, P.; Gammage, P. A.; Nicholls, T. J. J.; Pearce, S. F.; Patel, D.; Hauser, A.; Perocchi, F.; Minczuk, M. *Mol. Biol. Cell* **2014**, *25*, 2542-2555.
- (62) Kirino, Y.; Yasukawa, T.; Marjavaara, S. K.; Jacobs, H. T.; Holt, I. J.; Watanabe, K.; Suzuki, T. *Hum. Mol. Genet.* **2006**, *15*, 897-904.
- (63) Ito, S.; Horikawa, S.; Suzuki, T.; Kawauchi, H.; Tanaka, Y.; Suzuki, T.; Suzuki, T. *J. Biol. Chem.* **2014**, *289*, 35724-35730.
- (64) King, M. Y.; Redman, K. L. *Biochemistry* **2002**, *41*, 11218-11225.
- (65) Squires, J. E.; Patel, H. R.; Nusch, M.; Sibbritt, T.; Humphreys, D. T.; Parker, B. J.; Suter, C. M.; Preiss, T. *Nucleic Acids Res.* **2012**, *40*, 5023-5033.
- (66) Metodiev, M. D.; Spahr, H.; Loguercio Polosa, P.; Meharg, C.; Becker, C.; Altmueller, J.; Habermann, B.; Larsson, N. G.; Ruzzenente, B. *PLoS genetics* **2014**, *10*, e1004110.
- (67) Schosserer, M.; Minois, N.; Angerer, T. B.; Amring, M.; Dellago, H.; Harreither, E.; Calle-Perez, A.; Pircher, A.; Gerstl, M. P.; Pfeifenberger, S.; Brandl, C.; Sonntagbauer, M.; Kriegner, A.; Linder, A.; Weinhausel, A.; Mohr, T.; Steiger, M.; Mattanovich, D.; Rinnerthaler, M.; Karl, T., et al. *Nat Commun* **2015**, *6*, 6158.
- (68) Haag, S.; Warda, A. S.; Kretschmer, J.; Gunnigmann, M. A.; Hobartner, C.; Bohnsack, M. T. *RNA (New York, N.Y.)* **2015**, *21*, 1532-1543.
- (69) Anadón, C.; van Tetering, G.; Ferreira, H. J.; Moutinho, C.; Martínez-Cardús, A.; Villanueva, A.; Soler, M.; Heyn, H.; Moran, S.; Castro de Moura, M.; Setien, F.; Vidal, A.; Genescà, E.; Ribera, J. M.; Nomdedeu, J. F.; Guil, S.; Esteller, M. *Leukemia* **2017**, *31*, 1622-1625.
- (70) Edvardson, S.; Prunetti, L.; Arraf, A.; Haas, D.; Bacusmo, J. M.; Hu, J. F.; Ta-Shma, A.; Dedon, P. C.; de Crécy-Lagard, V.; Elpeleg, O. *Eur. J. Hum. Genet.* **2017**, *25*, 545-551.
- (71) Sun, H.; Zhang, M.; Li, K.; Bai, D.; Yi, C. *Cell Res.* **2019**, *29*, 80-82.
- (72) Wu, R.; Li, A.; Sun, B.; Sun, J. G.; Zhang, J.; Zhang, T.; Chen, Y.; Xiao, Y.; Gao, Y.; Zhang, Q.; Ma, J.; Yang, X.; Liao, Y.; Lai, W. Y.; Qi, X.; Wang, S.; Shu, Y.; Wang, H. L.; Wang, F.; Yang, Y. G., et al. *Cell Res.* **2019**, *29*, 23-41.
- (73) Carlile, T. M.; Rojas-Duran, M. F.; Zinshteyn, B.; Shin, H.; Bartoli, K. M.; Gilbert, W. V. *Nature* **2014**, *515*, 143-146.
- (74) Roovers, M.; Hale, C.; Tricot, C.; Terns, M. P.; Terns, R. M.; Grosjean, H.; Droogmans, L. *Nucleic Acids Res.* **2006**, *34*, 4293-4301.
- (75) Lecointe, F.; Simos, G.; Sauer, A.; Hurt, E. C.; Motorin, Y.; Grosjean, H. *J. Biol. Chem.* **1998**, *273*, 1316-1323.

- (76) Guzzi, N.; Ciesla, M.; Ngoc, P. C. T.; Lang, S.; Arora, S.; Dimitriou, M.; Pimkova, K.; Sommarin, M. N. E.; Munita, R.; Lubas, M.; Lim, Y.; Okuyama, K.; Soneji, S.; Karlsson, G.; Hansson, J.; Jonsson, G.; Lund, A. H.; Sigvardsson, M.; Hellstrom-Lindberg, E.; Hsieh, A. C., et al. *Cell* **2018**, *173*, 1204-1216.e1226.
- (77) Spenkuch, F.; Motorin, Y.; Helm, M. *RNA biology* **2014**, *11*, 1540-1554.
- (78) Zhang, J.; Lu, R.; Zhang, Y.; Matuszek, Z.; Zhang, W.; Xia, Y.; Pan, T.; Sun, J. *Cancers* **2020**, *12*.
- (79) Zhang, W.; Xu, R.; Matuszek, Z.; Cai, Z.; Pan, T. *RNA (New York, N.Y.)* **2020**, *26*, 1291-1298.
- (80) Patil, D. P.; Chen, C. K.; Pickering, B. F.; Chow, A.; Jackson, C.; Guttman, M.; Jaffrey, S. R. *Nature* **2016**, *537*, 369-373.
- (81) Wu, H.; Dong, H.; Fu, Y.; Tang, Y.; Dai, M.; Chen, Y.; Wang, G.; Wu, Y. *Clin. Exp. Pharmacol. Physiol.* **2021**, *48*, 270-278.
- (82) Pillutla, R. C.; Shimamoto, A.; Furuichi, Y.; Shatkin, A. J. *Genomics* **1998**, *54*, 351-353.
- (83) Uddin, M. B.; Wang, Z.; Yang, C. *Theranostics* **2020**, *10*, 3164-3189.
- (84) Waku, T.; Nakajima, Y.; Yokoyama, W.; Nomura, N.; Kako, K.; Kobayashi, A.; Shimizu, T.; Fukamizu, A. *J. Cell Sci.* **2016**, *129*, 2382-2393.
- (85) Baquero-Perez, B.; Antanaviciute, A.; Yonchev, I. D.; Carr, I. M.; Wilson, S. A.; Whitehouse, A. *Elife* **2019**, *8*.
- (86) Ussowicz, M.; Marcel, V.; Long, F. N. V.; Kazanowska, B.; Diaz, J. J.; Wołowiec, D. *Advances in clinical and experimental medicine : official organ Wroclaw Medical University* **2020**, *29*, 107-113.
- (87) Freund, I.; Buhl, D. K.; Boutin, S.; Kotter, A.; Pichot, F.; Marchand, V.; Vierbuchen, T.; Heine, H.; Motorin, Y.; Helm, M.; Dalpke, A. H.; Eigenbrod, T. *RNA (New York, N.Y.)* **2019**, *25*, 869-880.
- (88) Liu, X.; Shen, S.; Wu, P.; Li, F.; Liu, X.; Wang, C.; Gong, Q.; Wu, J.; Yao, X.; Zhang, H.; Shi, Y. *Nucleic Acids Res.* **2019**, *47*, 7648-7665.
- (89) Mouaikel, J.; Bujnicki, J. M.; Tazi, J.; Bordonné, R. *Nucleic Acids Res.* **2003**, *31*, 4899-4909.
- (90) Li, K.; Liu, J.; Yang, X.; Tu, Z.; Huang, K.; Zhu, X. *Biosci. Rep.* **2021**.
- (91) Goswami, M. T.; VanDenBerg, K. R.; Han, S.; Wang, L. L.; Singh, B.; Weiss, T.; Barlow, M.; Kamberov, S.; Wilder-Romans, K.; Rhodes, D. R.; Feng, F. Y.; Tomlins, S. A. *Molecular cancer research : MCR* **2019**, *17*, 1652-1664.
- (92) Goll, M. G.; Kirpekar, F.; Maggert, K. A.; Yoder, J. A.; Hsieh, C. L.; Zhang, X.; Golic, K. G.; Jacobsen, S. E.; Bestor, T. H. *Science* **2006**, *311*, 395-398.
- (93) Spinola, M.; Galvan, A.; Pignatiello, C.; Conti, B.; Pastorino, U.; Nicander, B.; Paroni, R.; Dragani, T. A. *Oncogene* **2005**, *24*, 5502-5509.
- (94) Dewe, J. M.; Fuller, B. L.; Lentini, J. M.; Kellner, S. M.; Fu, D. *Mol. Cell. Biol.* **2017**, *37*.
- (95) Ontiveros, R. J.; Shen, H.; Stoute, J.; Yanas, A.; Cui, Y.; Zhang, Y.; Liu, K. F. *Proc. Natl. Acad. Sci. U. S. A.* **2020**, *117*, 7782-7791.
- (96) Safra, M.; Sas-Chen, A.; Nir, R.; Winkler, R.; Nachshon, A.; Bar-Yaacov, D.; Erlacher, M.; Rossmannith, W.; Stern-Ginossar, N.; Schwartz, S. *Nature* **2017**, *551*, 251-255.
- (97) Esteve-Puig, R.; Bueno-Costa, A.; Esteller, M. *Cancer Lett.* **2020**, *474*, 127-137.
- (98) Zorbas, C.; Nicolas, E.; Wacheul, L.; Huvelle, E.; Heurgué-Hamard, V.; Lafontaine, D. L. J. *Mol. Biol. Cell* **2015**, *26*, 2080-2095.
- (99) Begik, O.; Lucas, M. C.; Liu, H.; Ramirez, J. M.; Mattick, J. S.; Novoa, E. M. *Genome Biol.* **2020**, *21*, 97.
- (100) Carter, J. M.; Emmett, W.; Mozos, I. R.; Kotter, A.; Helm, M.; Ule, J.; Hussain, S. *Nucleic Acids Res.* **2019**, *47*, e113.
- (101) Powell, C. A.; Kopajtich, R.; D'Souza, A. R.; Rorbach, J.; Kremer, L. S.; Husain, R. A.; Dallabona, C.; Donnini, C.; Alston, C. L.; Griffin, H.; Pyle, A.; Chinnery, P. F.; Strom, T. M.; Meitinger, T.; Rodenburg, R. J.; Schottmann, G.; Schuelke, M.; Romain, N.; Haller, R. G.; Ferrero, I., et al. *Am. J. Hum. Genet.* **2015**, *97*, 319-328.
- (102) Chujo, T.; Suzuki, T. *RNA (New York, N.Y.)* **2012**, *18*, 2269-2276.
- (103) Yan, Q.; Li, X.; Faye, G.; Guan, M. X. *J. Biol. Chem.* **2005**, *280*, 29151-29157.
- (104) Becker, H. F.; Motorin, Y.; Planta, R. J.; Grosjean, H. *Nucleic Acids Res.* **1997**, *25*, 4493-4499.

- (105) Zucchini, C.; Strippoli, P.; Biolchi, A.; Solmi, R.; Lenzi, L.; D'Addabbo, P.; Carinci, P.; Valvassori, L. *Int. J. Mol. Med.* **2003**, *11*, 697-704.
- (106) Lim, J.; Ha, M.; Chang, H.; Kwon, S. C.; Simanshu, D. K.; Patel, D. J.; Kim, V. N. *Cell* **2014**, *159*, 1365-1376.
- (107) Grell, T. A. J.; Young, A. P.; Drennan, C. L.; Bandarian, V. *J. Am. Chem. Soc.* **2018**, *140*, 6842-6852.
- (108) Currie, M. A.; Brown, G.; Wong, A.; Ohira, T.; Sugiyama, K.; Suzuki, T.; Yakunin, A. F.; Jia, Z. *RNA (New York, N.Y.)* **2017**, *23*, 346-354.
- (109) Yue, Y.; Liu, J.; Cui, X.; Cao, J.; Luo, G.; Zhang, Z.; Cheng, T.; Gao, M.; Shu, X.; Ma, H.; Wang, F.; Wang, X.; Shen, B.; Wang, Y.; Feng, X.; He, C.; Liu, J. *Cell discovery* **2018**, *4*, 10.
- (110) Ping, X. L.; Sun, B. F.; Wang, L.; Xiao, W.; Yang, X.; Wang, W. J.; Adhikari, S.; Shi, Y.; Lv, Y.; Chen, Y. S.; Zhao, X.; Li, A.; Yang, Y.; Dahal, U.; Lou, X. M.; Liu, X.; Huang, J.; Yuan, W. P.; Zhu, X. F.; Cheng, T., et al. *Cell Res.* **2014**, *24*, 177-189.
- (111) Chen, X.; Li, A.; Sun, B. F.; Yang, Y.; Han, Y. N.; Yuan, X.; Chen, R. X.; Wei, W. S.; Liu, Y.; Gao, C. C.; Chen, Y. S.; Zhang, M.; Ma, X. D.; Liu, Z. W.; Luo, J. H.; Lyu, C.; Wang, H. L.; Ma, J.; Zhao, Y. L.; Zhou, F. J., et al. *Nat. Cell Biol.* **2019**, *21*, 978-990.
- (112) Wang, X.; Zhao, B. S.; Roundtree, I. A.; Lu, Z.; Han, D.; Ma, H.; Weng, X.; Chen, K.; Shi, H.; He, C. *Cell* **2015**, *161*, 1388-1399.
- (113) Hsu, P. J.; Zhu, Y. F.; Ma, H. H.; Guo, Y. H.; Shi, X. D.; Liu, Y. Y.; Qi, M. J.; Lu, Z. K.; Shi, H. L.; Wang, J. Y.; Cheng, Y. W.; Luo, G. Z.; Dai, Q.; Liu, M. X.; Guo, X. J.; Sha, J. H.; Shen, B.; He, C. *Cell Res.* **2017**, *27*, 1115-1127.
- (114) Dai, X. X.; Wang, T. L.; Gonzalez, G.; Wang, Y. S. *Anal. Chem.* **2018**, *90*, 6380-6384.
- (115) Dai, X.; Gonzalez, G.; Li, L.; Li, J.; You, C.; Miao, W.; Hu, J.; Fu, L.; Zhao, Y.; Li, R.; Li, L.; Chen, X.; Xu, Y.; Gu, W.; Wang, Y. *Anal. Chem.* **2020**, *92*, 1346-1354.
- (116) Wen, J.; Lv, R.; Ma, H.; Shen, H.; He, C.; Wang, J.; Jiao, F.; Liu, H.; Yang, P.; Tan, L.; Lan, F.; Shi, Y. G.; He, C.; Shi, Y.; Diao, J. *Mol. Cell* **2018**, *69*, 1028-1038.e1026.
- (117) Ma, H.; Wang, X.; Cai, J.; Dai, Q.; Natchiar, S. K.; Lv, R.; Chen, K.; Lu, Z.; Chen, H.; Shi, Y. G.; Lan, F.; Fan, J.; Klaholz, B. P.; Pan, T.; Shi, Y.; He, C. *Nat. Chem. Biol.* **2019**, *15*, 88-94.



**Figure S1.** (a) Gene Ontology (GO) Biological Pathway (BP) analysis of those epitranscriptomic RWE proteins differentially expressed by at least 1.5-fold in either of the two pairs of matched parental/radioresistant breast cancer cell lines. The analysis was carried out using Database for Annotation, Visualization and Integrated Discovery (DAVID). (b) Kaplan-Meier survival analysis of METABRIC cohort who received radiation therapy. Patients were stratified by mRNA expression level of *CTU1* with median value as a cutoff. (c-d) GSEA enrichment plots generated from GSEA 4.1.0 software showing significant enrichment of TRMT1 with Myc\_targets\_V1 (c) and UV-response\_up (d).

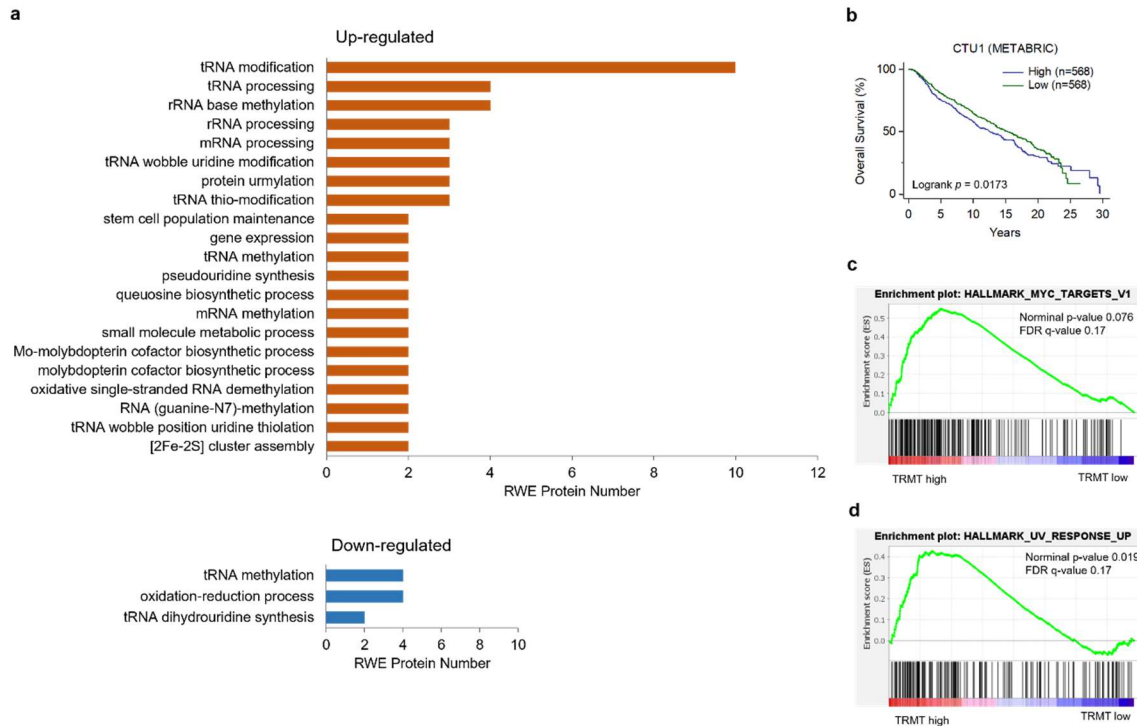

Supplement: NIHMS1771640-supplement-Supporting_pdf.pdf [file NIHMS1771640-supplement-Supporting_pdf.pdf]
